# Supplementary material for: Leucine supplementation during late gestation globally alters placental metabolism and nutrient transportviamodulation of the PI3K/AKT/mTOR signaling pathway in sows
Source: Royal Society of Chemistry journal article supplement (doi:10.1039/d1fo04082k), 2022-01-01
Supplement: d1fo04082k1.pdf [file d1fo04082k1.pdf]

1 **Supplemental Table 1. Relative gene expression of nutrient transporters in**  
2 **placenta**

| Gene    | Control                | 0.4% Leucine           | 0.8% Leucine           |
|---------|------------------------|------------------------|------------------------|
| SLC1A4  | 1.12±0.13              | 1.31±0.17              | 1.04±0.21              |
| SLC7A1  | 1.14±0.19 <sup>a</sup> | 2.27±0.28 <sup>b</sup> | 2.39±0.34 <sup>b</sup> |
| SLC7A2  | 1.09±0.21 <sup>a</sup> | 2.65±0.29 <sup>b</sup> | 5.13±1.32 <sup>c</sup> |
| SLC7A5  | 1.07±0.09              | 1.12±0.23              | 1.09±0.16              |
| SLC7A6  | 1.13±0.08              | 1.11±0.12              | 1.16±0.21              |
| SLC7A7  | 1.08±0.11              | 1.04±0.14              | 1.08±0.21              |
| SLC7A8  | 1.17±0.19 <sup>a</sup> | 3.75±0.47 <sup>b</sup> | 4.32±0.89 <sup>c</sup> |
| SLC7A10 | 1.11±0.13              | 1.16±0.21              | 1.09±0.18              |
| SLC7A11 | 1.02±0.19 <sup>a</sup> | 4.13±0.67 <sup>b</sup> | 4.32±0.87 <sup>b</sup> |
| SLC15A1 | 1.03±0.21 <sup>a</sup> | 1.89±0.19 <sup>b</sup> | 3.76±0.43 <sup>c</sup> |
| SNAT1   | 1.06±0.21 <sup>a</sup> | 1.57±0.31 <sup>a</sup> | 1.62±0.29 <sup>b</sup> |
| SNAT2   | 1.09±0.18              | 1.13±0.21              | 1.14±0.22              |
| LAT1    | 1.07±0.24 <sup>a</sup> | 1.61±0.31 <sup>b</sup> | 1.63±0.37 <sup>b</sup> |
| 4F2hc   | 1.04±0.19 <sup>a</sup> | 1.78±0.23 <sup>b</sup> | 1.80±0.21 <sup>b</sup> |
| rBAT    | 1.02±0.11 <sup>a</sup> | 1.45±0.19 <sup>b</sup> | 1.48±0.22 <sup>b</sup> |
| SLC2A1  | 1.07±0.12 <sup>a</sup> | 5.22±0.89 <sup>b</sup> | 7.89±0.43 <sup>c</sup> |
| SLC2A2  | 1.05±0.13 <sup>a</sup> | 2.17±0.23 <sup>b</sup> | 2.19±0.31 <sup>b</sup> |
| SLC2A3  | 1.04±0.18 <sup>a</sup> | 6.18±0.97 <sup>b</sup> | 8.13±0.74 <sup>c</sup> |
| SLC2A5  | 1.03±0.17              | 1.04±0.19              | 1.07±0.21              |
| SLC2A6  | 1.07±0.14 <sup>a</sup> | 1.88±0.31 <sup>b</sup> | 2.14±0.34 <sup>b</sup> |
| SLC2A8  | 1.01±0.13              | 1.04±0.12              | 1.02±0.18              |
| SGLT1   | 1.02±0.17              | 1.11±0.21              | 1.09±0.20              |
| SCLT3   | 1.05±0.19              | 1.45±0.39              | 1.31±0.25              |
| SGLT5   | 1.06±0.21              | 1.41±0.32              | 1.43±0.28              |
| FATP1   | 1.08±0.34 <sup>a</sup> | 2.56±0.38 <sup>b</sup> | 2.68±0.45 <sup>b</sup> |
| FATP2   | 1.07±0.23 <sup>a</sup> | 1.56±0.29 <sup>b</sup> | 2.17±0.31 <sup>c</sup> |
| FATP3   | 1.06±0.21              | 1.08±0.23              | 1.07±0.19              |
| FATP4   | 1.08±0.19              | 1.11±0.24              | 1.12±0.21              |
| CD36    | 1.01±0.29 <sup>a</sup> | 1.56±0.31 <sup>b</sup> | 1.63±0.24 <sup>b</sup> |
| FABP3   | 1.03±0.19 <sup>a</sup> | 1.43±0.21 <sup>b</sup> | 1.34±0.23 <sup>b</sup> |
| FABP4   | 1.04±0.17              | 1.06±0.17              | 1.08±0.19              |
| FABP5   | 1.02±0.13 <sup>a</sup> | 1.53±0.21 <sup>b</sup> | 1.61±0.27 <sup>b</sup> |
| FABP7   | 1.01±0.21 <sup>a</sup> | 2.61±0.31 <sup>b</sup> | 2.76±0.41 <sup>b</sup> |

3 Note: Dates are showed as means ± SEM (n = 10), Different letters (a, b, c) indicate significant  
4 differences (P<0.05).

5

**Supplemental Table 2. Differential metabolites between the placenta from 3 groups of sows**

| <b>Metabolites</b>                       | <b>AB<br/>(VIP)</b> | <b>AB<br/>(P)</b> | <b>Ratio<br/>(B/A)</b> | <b>AC<br/>(VIP)</b> | <b>AC<br/>(P)</b> | <b>Ratio<br/>(C/A)</b> | <b>BC<br/>(VIP)</b> | <b>BC<br/>(P)</b> | <b>Ratio<br/>(C/B)</b> |
|------------------------------------------|---------------------|-------------------|------------------------|---------------------|-------------------|------------------------|---------------------|-------------------|------------------------|
| Glutathione                              | 4.70                | 0.04              | 1.93                   | 3.90                | 0.03              | 2.23                   | 0.79                | 0.09              | 1.12                   |
| PC(16:0/18:2(9Z,12Z))                    | 5.25                | 0.03              | 1.87                   | 0.92                | 0.07              | 1.23                   | 0.87                | 1.21              | 0.94                   |
| Octadecyl fumarate                       | 4.17                | 0.02              | 0.71                   | 0.76                | 1.22              | 0.89                   | 0.65                | 1.67              | 1.97                   |
| PC(20:0/16:1(9Z))                        | 1.66                | 0.03              | 2.45                   | 1.25                | 0.01              | 3.27                   | 0.67                | 0.60              | 1.12                   |
| 1-Phenyl-1,3-eicosanedione               | 9.12                | 0.04              | 4.22                   | 0.89                | 1.56              | 3.11                   | 0.45                | 2.67              | 2.28                   |
| Hydroxy-3-oxocholanoic acid              | 2.30                | 0.02              | 2.34                   | 0.79                | 0.09              | 1.67                   | 0.87                | 0.91              | 1.22                   |
| PA(P-20:0/22:0)                          | 1.15                | 0.04              | 0.89                   | 0.79                | 0.88              | 1.12                   | 0.96                | 1.67              | 0.98                   |
| 2-Arachidonoylglycerophosphocholine      | 3.22                | 0.03              | 2.13                   | 2.04                | 0.01              | 2.34                   | 0.67                | 1.22              | 0.79                   |
| PC(16:0/18:1(11Z))                       | 2.05                | 0.03              | 0.74                   | 2.89                | 0.02              | 0.86                   | 1.61                | 0.08              | 1.23                   |
| LysoPC(20:4(5Z,8Z,11Z,14Z))              | 1.64                | 0.01              | 1.97                   | 1.89                | 0.04              | 2.23                   | 0.57                | 1.89              | 1.34                   |
| L-Histidine                              | 3.05                | 0.03              | 0.89                   | 3.00                | 0.05              | 0.78                   | 0.29                | 1.67              | 1.25                   |
| SM(d18:1/24:1(15Z))                      | 2.35                | 0.04              | 1.89                   | 3.15                | 0.03              | 2.25                   | 0.86                | 0.09              | 1.36                   |
| MG(0:0/22:4(7Z,10Z,13Z,16Z)/0:0)         | 3.10                | 0.03              | 2.67                   | 1.89                | 0.04              | 3.11                   | 0.95                | 1.22              | 1.34                   |
| MG(22:4(7Z,10Z,13Z,16Z)/0:0/0:0)         | 1.81                | 0.04              | 2.21                   | 1.73                | 0.05              | 1.94                   | 0.67                | 0.08              | 1.34                   |
| SM(d18:0/18:1(11Z))                      | 1.21                | 0.01              | 2.21                   | 1.81                | 0.02              | 2.56                   | 0.86                | 0.97              | 1.22                   |
| PE(18:0/20:2(11Z,14Z))                   | 0.72                | 0.60              | 0.89                   | 2.02                | 0.02              | 1.89                   | 1.97                | 0.06              | 1.66                   |
| MG(22:5(4Z,7Z,10Z,13Z,16Z)/0:0/0:0)      | 2.39                | 0.24              | 2.23                   | 2.39                | 0.03              | 3.25                   | 4.45                | 0.03              | 1.97                   |
| PC(22:5(7Z,10Z,13Z,16Z,19Z)/16:0)        | 0.98                | 0.08              | 1.32                   | 1.39                | 0.03              | 2.99                   | 3.27                | 0.01              | 2.78                   |
| L-Phenylalanine                          | 0.97                | 0.15              | 1.15                   | 2.00                | 0.04              | 3.21                   | 1.67                | 0.03              | 2.17                   |
| C16 Sphinganine                          | 1.20                | 0.18              | 1.07                   | 1.76                | 0.03              | 3.31                   | 1.23                | 0.04              | 1.56                   |
| 3-O-Sulfogalactosylceramide (d18:1/22:0) | 2.62                | 0.14              | 4.23                   | 2.56                | 0.04              | 2.78                   | 0.56                | 0.97              | 2.22                   |
| 1-Hydroxyprevitamin D3 diacetate         | 0.97                | 0.89              | 0.84                   | 1.96                | 0.02              | 1.88                   | 0.74                | 0.54              | 1.35                   |
| N-Decanoyl-L-histidine                   | 0.35                | 1.22              | 1.23                   | 1.34                | 0.03              | 2.11                   | 0.25                | 0.73              | 2.89                   |
| PI(17:0/22:4(7Z,10Z,13Z,16Z))            | 0.79                | 2.35              | 0.89                   | 2.13                | 0.04              | 0.79                   | 1.36                | 0.03              | 0.88                   |

|                         |      |      |      |      |      |      |      |      |      |
|-------------------------|------|------|------|------|------|------|------|------|------|
| epsilon-Tocopherol      | 0.60 | 0.77 | 1.56 | 1.63 | 0.04 | 2.67 | 1.71 | 0.01 | 3.09 |
| 3,4-Diethylthiophene    | 0.97 | 0.09 | 2.23 | 1.89 | 0.02 | 0.79 | 2.23 | 0.02 | 0.69 |
| d-Tocotrienol           | 1.23 | 0.33 | 1.77 | 0.92 | 0.26 | 1.98 | 1.96 | 0.03 | 2.34 |
| Gamma-Tocotrienol       | 0.81 | 0.47 | 0.79 | 0.97 | 0.06 | 1.23 | 1.56 | 0.04 | 1.78 |
| Tetracosahexaenoic acid | 0.84 | 1.23 | 2.12 | 0.65 | 0.09 | 1.97 | 2.96 | 0.04 | 1.53 |

Note: A is control group, B is control + 0.4% Leu and C is control + 0.8% Leu.  $P < 0.05$  indicates significant differences.
